# Supplementary material for: Chemical biology suggests pleiotropic effects for a novel hexanuclear copper(ii) complex inducing apoptosis in hepatocellular carcinoma cells
Source: Royal Society of Chemistry journal article supplement (doi:10.1039/c9cc05995d), 2019-01-01
Supplement: c9cc05995d1.pdf [file c9cc05995d1.pdf]

## **Electronic Supplementary Information (ESI)**

# **Chemical biology suggests pleiotropic effects for a novel hexanuclear copper(II) complex inducing apoptosis in hepatocellular carcinoma cells**

Junshuai Zhang,<sup>a</sup> Jiyong Hu,<sup>a</sup> Kun Peng,<sup>b</sup> Wei Song,<sup>a</sup> Shuangcheng Zhi,<sup>a</sup> Endian Yang,<sup>a</sup> Jin'an Zhao,<sup>\*ac</sup> Hongwei Hou<sup>c</sup>

a. College of material and chemical engineering, Henan University of Urban Construction, Henan 467036, P.R. China. E-mail: zjinan@zzu.edu.cn

b. Institute of inorganic chemistry, University of Wuerzburg, Bavaria 97074, Germany

c. College of chemistry and molecular engineering, Zhengzhou University, Zhengzhou 450001

## 1. Materials and Instruments.

All solvents and reagents were of commercial quality (> 95% purity). And all buffer components were of biological grade and used without further purification. Cisplatin was purchased from Shanghai Energy Chemical Co. Ltd. 3-(4,5-dimethylthiazol-2-yl)-2,5-diphenyltetrazolium bromide (MTT), Ethidium bromide (EB), propidium iodide (PI), calf thymus DNA (CT-DNA) were purchased from Sigma-Aldrich Co. (St. Louis, MO, USA). The Annexin V-FITC apoptosis assay kit and cycletest plus DNA reagent kit were obtained from BD Biosciences Inc.(SJ, USA). TMT-6plex isobaric label reagent set was obtained from Thermo Fisher Scientific Inc.

UV-Vis absorption spectra were tested using a Specord 200 UV–visible spectrophotometer. The FT-IR spectra were recorded on a PerkinElmer Frontier spectrophotometer from KBr pellets in the region of 400–4000  $\text{cm}^{-1}$ , and the elemental analyses were conducted with elemental Vario MACRO cube analyzer after heated complexes **1** at 180 °C for 24 h under vacuum. Thermogravimetric experiments were performed using a NETZSCH STA 449F3 instrument. MTT assay were measured using a Tecan Infinite M1000 Pro microplate reader. The contents of Cu were determined on an inductively coupled plasma mass spectrometer (ICP-MS) with Nex ION 300X instrument (PerkinElmer, USA). The visualization analysis of comet assays and ROS detection was measured by Zeiss Axio Vert. A1 invert fluorescence microscope. Most flow cytometric analysis was carried out with a Guava easyCyte 6-2I flow cytometer (Millipore, USA), whereas Cell cycle were performed on BD LSR Fortessa TM Cell Analyzer (USA). All nanoLC-MS/MS experiments were performed on a Q Exactive equipped with an Easy n-LC 1000 HPLC system. The MS analysis was performed with Q Exactive mass spectrometer.

## 2. Synthesis of Complex 1

A mixture of  $\text{Cu}(\text{NO}_3)_2 \cdot 3\text{H}_2\text{O}$  (0.0072 g, 0.03 mmol), tpbb (0.0070 g, 0.01 mmol), acetonitrile (1 mL), and chloroform (1 mL) was placed in a glass reactor (10 mL) which was heated at 85 °C for 2 days and then gradually cooled to room temperature at a rate of 5 °C/h. Blue crystals of the complex were obtained. Yield: 65% (based on Cu). Elemental Anal. Calcd for  $\text{C}_{45}\text{H}_{33}\text{Cu}_3\text{N}_{15}\text{O}_{18}$  (%): C, 42.81%; H, 2.63%; N, 16.65%; Found (%): C, 42.46%; H, 2.78%; N, 16.42%. IR (KBr/pellet,  $\text{cm}^{-1}$ ): 3432 s, 1605 w, 1481 s, 1438 m, 1384 m, 1276 s, 1167 w, 1008 m, 749 m, 668 w.

## 3. Crystal Structure Analysis

The single crystal suitable for X-ray determination was selected and mounted on a glass fiber. Diffraction data was recorded on a SuperNova with graphite monochromated Cu-K $\alpha$  ( $\lambda = 1.54184$  Å) at 293(2) K. The structure was handled by direct methods and expanded with Fourier techniques. The calculation was conducted with the Olex2 and SHELXL-2018 crystallographic program.<sup>1</sup> All the non-hydrogen atoms were refined anisotropically. The final cycle of full-matrix least-squares refinement was based on the observed reflections and variable parameters. Besides, as the thermal vibration of solvent molecules in complex 1 are extremely large, then removed by the SQUEEZE option of the PLATON software to subtract their contribution to the overall intensity data.<sup>2</sup> Table S1 gives the crystallographic crystal data and structure processing parameters of the complex, and the selected bond lengths and bond angles of it are listed in Table S2. Detailed data for the crystal structure have been deposited with the Cambridge Crystallographic Data Center, CCDC (1885563), as supplementary crystallographic data for the present paper. These data can be obtained free of charge from The Cambridge Crystallographic Data Center via [www.ccdc.cam.ac.uk/data\\_request/cif](http://www.ccdc.cam.ac.uk/data_request/cif). The graphics were drawn and additional structural calculations were performed by DIAMOND<sup>5</sup> software.

## 4. DNA Binding Studies

Having a good stability of complex **1** is crucial for the next biological studies, and it was conducted in saline.<sup>3</sup> The complex is soluble at 15  $\mu\text{M}$  in Tris-HCl/NaCl buffer (10 mM Tris-HCl/50 mM NaCl, pH 7.40) containing 0.5% dimethylsulfoxide (DMSO). Then, UV-vis absorption spectra was recorded at a series of different time points (10 min, 2h, 24 h, 48 h and 72 h) respectively.

All experiments involving CT-DNA were determined in Tris-HCl buffer solution (5 mM Tris-HCl/50 mM NaCl, pH 7.40). The concentration of CT-DNA was determined by UV absorbance at 260 nm, taking  $6600 \text{ M}^{-1}\text{cm}^{-1}$  as the molar absorption coefficient. The ratio of UV absorbance at 260 and 280 nm ( $A_{260}/A_{280}$ ) was 1.85, indicating that the DNA solution was sufficiently free of protein.<sup>4,5</sup> Stock solution of CT-DNA was stored at 4 °C.

### 4.1 UV-Vis Absorption Spectra

The absorption spectra was performed by maintaining the concentrations of the complex (10  $\mu\text{M}$ ) with increasing concentration of DNA with the  $R_{[\text{DNA}/\text{complex } 1]} = 0.25, 0.5, 1, 1.5, 2, 2.5, 3, 4, 5, 6, 7$ . The corresponding CT-DNA solution was deducted to eliminate the absorbance of DNA due to DNA at the measured wavelength. Before the absorption spectra was obtained, the complexes and DNA mixtures were incubated for 30 min at 37 °C and the absorption spectra was scanned by a Specord 200 UV-visible spectrophotometer.

### 4.2 Emission Spectra

Emission spectroscopic studies of complex **1** with EB was performed using fluorescence spectroscopy. The EB was carried out in Tris-HCl/NaCl buffer (5 mM Tris-HCl, 50 mM NaCl, pH = 7.4). The DNA-EB solution (60  $\mu\text{M}$  CT-DNA and 12  $\mu\text{M}$  EB) was incubated for 1 h at 37 °C and then different concentrations (10-100  $\mu\text{M}$ ) were added into EB-DNA. After 3 h at 37 °C, fluorescence quenching results were measured by recording the variation of fluorescence emission spectra ( $\lambda_{\text{ex}} = 490 \text{ nm}$ ,  $\lambda_{\text{em}} = 510.0\text{--}850.0 \text{ nm}$ ).

### 4.3 DNA Cleavage Studies

The cleavage studies of pBR322 supercoiled plasmid DNA was conducted by treating with different concentrations of the complex in a Tris-HCl buffer containing 50 mM Tris-HCl and 50 mM NaCl at pH 7.4 in the presence and absence of Vc, and the sample was incubated at 37 °C for 2 h, after that loading buffer was added. Then the samples were subjected to electrophoresis to separate DNA fragments on 1% agarose gel at 80 V for 2 h. The stained electrophoresis bands by EB were visualized under a BIO-RAD Laboratories-Segrate gel imaging system.

## 5. Molecular docking analysis

The AutoDock 4.2 program was used to model the interaction between the complex and DNA. The X-ray crystal structure of the complex was selected in the subsequent docking and MD simulation as its large structure could not converge when using gaussian optimization algorithm. The DNA duplex of the sequence 5'-CGCGAATTCGCG-3' dodecamer was used for the docking study. For docking calculations, a Lamarckian genetic algorithm (LGA) was implemented with a total of 100 runs for the binding site. After the docking, the adducts with higher score was further studied by MD simulation using Amber 11.0 software.

## 6. Cell experiments

### 6.1 Cell Culture

The cisplatin resistant human cholangiocarcinoma cell line QBC939, esophagus tumor cell line EC109, liver tumor cell line SMMC7721 and normal liver cell LO-2 were purchased from KeyGEN bioTECH, and neuroblast tumor cell line SH-SY5Y were obtained from Xiamen University. The cells were routinely maintained in RPMI1640 (QBC939, EC109 and SMMC7721) and DMEM (SH-SY5Y) supplemented with 10% FBS (fetal bovine serum, Gemini), 100 U/mL streptomycin, and 100 ng/ mL penicillin at 37 °C under a humidified atmosphere containing 5% CO<sub>2</sub>.

## **6.2 Cytotoxicity Assay**

For the colorimetric MTT cytotoxicity test involving Cu (II) complex, a total of  $6 \times 10^3$  cells/well were seeded in a 96-well plate and incubated in 5% CO<sub>2</sub>/95% air at 37 °C for 24h, then the medium was eliminated and replaced with a fresh one (200  $\mu$ L) containing the complex at five different concentrations. The test timescale (48 h) was established for each treatment. Finally, 20  $\mu$ L of MTT solution (5 mg/mL in 1 $\times$ PBS) was added in each well and left to incubate in the dark for 4h. The optical density of each well was measured at test wavelength of 492 nm using a microplate reader, the background absorbance of the media without cells + MTT was deducted from each well, and the control cells represented 100% viability.

## **6.3 Cellular Uptake Analysis**

Exponentially growing SMMC7721 and LO-2 cells were seeded at a density of  $6 \times 10^5$  cells in Petri dishes, after incubation for 24h at 37 °C, the cells were administered with 15  $\mu$ M of copper complex and incubated for different time intervals. Then the cells were collected, and the nucleus and cytoplasm fractions of cells were extracted by a Cell Mitochondria Isolation Kit (Shanghai Beyotime Biological technology Co. Ltd). Briefly, the cells were firstly digested and washed twice with ice-cold PBS, then centrifuged at 600 g for 5 min. The sediment was gently suspended with cell mitochondria isolation reagent containing 1 mM PMSF in the ice for 10 min, then the cell suspension was transferred into a glass homogenizer (10 mL) with uniformly grinding 15 times. Again centrifuged at 600 g for 10 min at 4 °C, the supernatant was the cytoplasmic fraction and transferred to a clean microcentrifuge tube. The sediment at the bottom was the cell nuclei. Both the nucleus and cytoplasm were mineralized with 65% HNO<sub>3</sub> (100  $\mu$ L, 1 h), 30% H<sub>2</sub>O<sub>2</sub> (50  $\mu$ L, 1 h) and 36%-38% HCl (100  $\mu$ L, 2 h) at 95 °C. And the total volume of each sample was diluted with ultrapure water to 1 mL, as cellular metal levels were shown as ng Cu per mL protein. An aliquot was used for protein concentration determined by the calibration curve created using Bradford method, and BSA as a reference standard. The copper concentration in each sample was determined by ICP-MS.

## **6.4 Comet Assay**

SMMC7721 cells ( $2 \times 10^5$  cells) were treated with copper complex of varying concentrations for 12 h. Whereafter, cells were digested and resuspended with 1 mL PBS. And certain volume of cell suspension about 1000 cells were taken out to combine with 1% low-melting point agarose. The mix was then spread on slides which precoated with 0.5% normal melting point agarose, and then the slides were immersed into lysis buffer (2.5 M NaCl, 0.1 M EDTA, 0.01 M Tris base, 1% Triton-X100, 10% DMSO, pH 12) at 4 °C for 120 min. The slides were placed horizontally in an electrophoresis tank, submerging with alkaline electrophoresis buffer (0.3 M NaOH, 0.5 M EDTA) for 20 min at 4 °C, after which electrophoresis was carried out at 25 V for 30 min. Finally, the slides were neutralized with PBS, stained with 20  $\mu$ L of ethidium bromide (50  $\mu$ g/mL) at 37 °C

for 15 min and analyzed with a fluorescence microscope.

### **6.5 Cell Cycle Arrest**

SMMC7721 cells were plated at  $3 \times 10^5$ /well in 6-well plates and incubated for 24 h. Then the medium replaced with complex **1** (0, 5, 10 and 15  $\mu\text{M}$ ). After incubation for 12 h, the cells were harvested. The cell staining procedure used the CycleTEST™ PLUS DNA Reagent Kit.

### **6.6 Analysis of Apoptosis**

#### **Determination of Mitochondrial Membrane Potential**

SMMC7721 cells were seeded in 6-well plates and treated with different concentrations (0, 10 and 15  $\mu\text{M}$ ) for 12 h. The cells were harvested by trypsinization and then labeled with fluorescent dye rhodamine at 37 °C for 30 min in the dark. Then the cells were washed three times with RPMI 1640 and measured by flow cytometer.

#### **ROS Generating**

SMMC7721 cells were seeded in 6-well plates at a density of  $3 \times 10^5$  cells per well and treated with complex **1** at different concentrations for 12 h. The fluorescent dye  $\text{H}_2\text{DCF-DA}$  was added to the medium with a final concentration of 10  $\mu\text{M}$  to cover the cells at 37 °C for 20 min, then the cells were washed with RPMI 1640 for three times to eliminate dissociative fluorescent dye, and imaged with fluorescence microscope at 525 nm.

#### **Flow Cytometric Analysis of Apoptosis**

To further ascertain whether the complex induced cell death was caused due to an apoptotic pathway, we performed the Annexin V/PI dual assay to detect the presence of apoptotic cells after incubation with different concentrations of complex **1** (0, 10 and 15  $\mu\text{M}$ ) for 12h. Then the cells was collected and washed with cold  $1 \times \text{PBS}$ , resuspended in 200  $\mu\text{L}$  binding buffer, and thereafter incubated with 5  $\mu\text{L}$  Annexin V-FITC and 5  $\mu\text{L}$  of PI solution for 15 min at 4 °C. Analysis was subsequently performed on flow cytometer.

### **6.7 Proteomics Analysis**

#### **Protein extraction and TMT Labeling**

The cells were incubated with different concentrations (0, 5 and 10  $\mu\text{M}$ ) of complex **1** and disrupted by sonication on ice with 8 M urea/0.1 M Tris-HCl (pH 8.0)/ $1 \times$  Protease Inhibitor Cocktail (Roche). The protein was reduced with DTT for 2 h at 25 °C followed by alkylation with iodoacetamide for 30 min in the dark. The protein solution was diluted with TEAB and digested with trypsin at 37 °C overnight. The digestion was desalted on OASIS HLB column and peptides eluted with 60% acetonitrile were lyophilized via vacuum centrifugation. Then the dried peptides were dissolved with 100 mM TEAB buffer prior to labeled with Tandem Mass Tags (TMT). 100  $\mu\text{g}$  of protein from each biological replicate of different experimental conditions was labeled with TMT six-plex® (Thermo Scientific) according to the manufacturer's instructions. The samples were labeled as follows: TMT-126/-127 was used for control samples, TMT-128/-129 for 5  $\mu\text{M}$  treated samples and TMT-130/-131 for 10 $\mu\text{M}$  treated samples.

#### **Peptide Pre-Fractionation Using High pH Reversed-Phase HPLC**

Samples were fractionated using a Waters XBridge BEH130 C18 5  $\mu\text{m}$  4.6  $\times$  250 mm column on a L-3000 HPLC System (Rigol) operating at 0.7 mL/min. All fractions were collected

at 90s intervals and concatenated into 12 post-fractions and lyophilized.

### **LC-MS/MS Analysis**

All nanoLC-MS/MS experiments were performed on a Q Exactive equipped with an Easy n-LC 1000 HPLC system. The labeled peptides were loaded onto a fused silica trap column packed in-house with reversed phase silica and then separated on an C18 column packed with reversed phase silica. The MS analysis was performed with Q Exactive mass spectrometer. With the data-dependent acquisition mode, the MS data were acquired at a high resolution 70,000 ( $m/z$  200) across the mass range of 300–1600  $m/z$ .

### **Protein Identification and Quantification Analysis**

The raw data from Q Exactive were analyzed with Proteome Discovery version 2.2.0.388 using Sequest HT search engine for protein identification and Percolator for FDR (false discovery rate) analysis. The Uniprot human protein database (updated 05-2017) was used for searching the data from human sample. FDR analysis was performed with Percolator, and FDR <1% was set for protein identification. The peptides confidence was set as high for peptides filter. Proteins quantification was performed using the ratio of the intensity of reporter ions from the MS/MS spectra. Only unique and razor peptides of proteins were selected for protein relative quantification.

### **References**

1. G. M. Sheldrick, *Acta. Crystallogr. A.*, 2008, **64**, 112.
2. S. Lipstman, S. Muniappan and I. Goldberg, *Cryst. Growth. Des.*, 2008, **8**, 1683.
3. I. Yousuf, F. Arjmand, S. Tabassum, L. Toupet, R. A. Khanc, M. A. Siddiqui, *Dalton Trans.*, 2015, **44**, 10330.
4. J. Marmur, *J. Mol. Bio.*, 1961, **3**, 208.
5. M. Reichmann, S. Rice, C. Thomas and P. Doty, *J. Am. Chem. Soc.*, 1954, **76**, 3047.

## 7. Supplementary Spectra and Charts

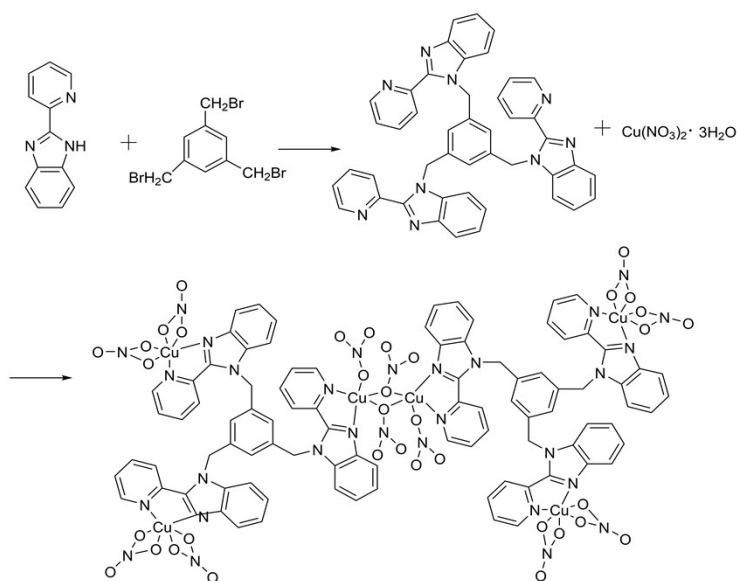

**Scheme S1.** The routine of  $\text{Cu}_6(\text{tpbb})_2(\text{NO}_3)_{12}$  synthesis

**Table S1.** Crystallographic data and structure refinement parameters for the complex

| Complex                                  | <b>1</b>                                                          |
|------------------------------------------|-------------------------------------------------------------------|
| Formula                                  | $\text{Cu}_3\text{C}_{45}\text{H}_{33}\text{N}_{15}\text{O}_{18}$ |
| Formula weight                           | 1262.48                                                           |
| Temp(K)                                  | 293(2)                                                            |
| $\lambda$ (Mo Cu/ $K\alpha$ ), Å         | 1.5418                                                            |
| Crystal system                           | monoclinic                                                        |
| Space group                              | $\text{P2}_1/\text{n}$                                            |
| a (Å)                                    | 12.1943(4)                                                        |
| b (Å)                                    | 24.9979(10)                                                       |
| c (Å)                                    | 19.9314(7)                                                        |
| $\alpha$ (deg)                           | 90.00                                                             |
| $\beta$ (deg)                            | 94.521(3)                                                         |
| $\gamma$ (deg)                           | 90.00                                                             |
| V (Å <sup>3</sup> )                      | 6056.8(4)                                                         |
| Z                                        | 4                                                                 |
| F(000)                                   | 2556.0                                                            |
| $\theta$ range for data collection (deg) | 8.088~ 134.16                                                     |
| Final R1, <sup>a</sup> wR2 <sup>b</sup>  | 0.0997, 0.2623                                                    |
| goodness-of-fit on $F^2$                 | 1.025                                                             |



**Table S2.** Selected bond lengths (Å) and angles (°) for the complex

| <b>Bond lengths</b> |          |                   |           |
|---------------------|----------|-------------------|-----------|
| Cu(1)–O(4)          | 1.981(5) | Cu(1)–O(4) #1     | 2.412(6)  |
| Cu(1)–N(2)          | 1.956(6) | Cu(1)–O(3)        | 1.959(7)  |
| Cu(1)–N(1)          | 2.020(8) | Cu(3)–N(8)        | 1.961(7)  |
| Cu(3)–N(7)          | 1.989(8) | Cu(3)–O(16)       | 2.016(8)  |
| Cu(3)–O(13)         | 1.952(8) | Cu(2)–N(4)        | 2.028(8)  |
| Cu(2)–N(5)          | 1.954(8) | Cu(2)–O(8)        | 1.991(8)  |
| Cu(2)–O(7)          | 2.440(9) | Cu(2)–O(10)       | 1.987(14) |
| <b>Bond angles</b>  |          |                   |           |
| O(4)–Cu(1)–O(4) #1  | 73.1(2)  | O(4)–Cu(1)–N(1)   | 93.3(3)   |
| N(2)–Cu(1)–O(4) #1  | 99.1(2)  | N(2)–Cu(1)–O(4)   | 170.4(2)  |
| N(2)–Cu(1)–O(3)     | 95.1(3)  | N(2)–Cu(1)–O(1)   | 81.7(3)   |
| O(3)–Cu(1)–O(4)#1   | 92.6(3)  | O(3)–Cu(1)–O(4)   | 90.8(3)   |
| O(3)–Cu(1)–N(1)     | 172.9(3) | N(1)–Cu(1)–O(4)#1 | 94.1(3)   |
| N(8)–Cu(3)–N(7)     | 81.9(3)  | N(8)–Cu(3)–O(16)  | 94.3(3)   |
| N(7)–Cu(3)–O(16)    | 154.0(3) | O(13)–Cu(3)–N(8)  | 170.9(4)  |
| O(13)–Cu(3)–N(7)    | 96.7(4)  | O(13)–Cu(3)–O(16) | 90.8(3)   |
| N(4)–Cu(2)–O(7)     | 93.8(4)  | N(5)–Cu(2)–N(4)   | 80.6(3)   |
| N(5)–Cu(2)–O(8)     | 173.0(3) | N(5)–Cu(2)–O(7)   | 120.1(3)  |
| N(5)–Cu(2)–O(10)    | 95.5(5)  | O(8)–Cu(2)–N(4)   | 94.1(3)   |
| O(8)–Cu(2)–O(7)     | 55.4(3)  | O(10)–Cu(2)–N(4)  | 168.9(6)  |
| O(10)–Cu(2)–O(8)    | 90.5(5)  | O(10)–Cu(2)–O(7)  | 97.2(6)   |

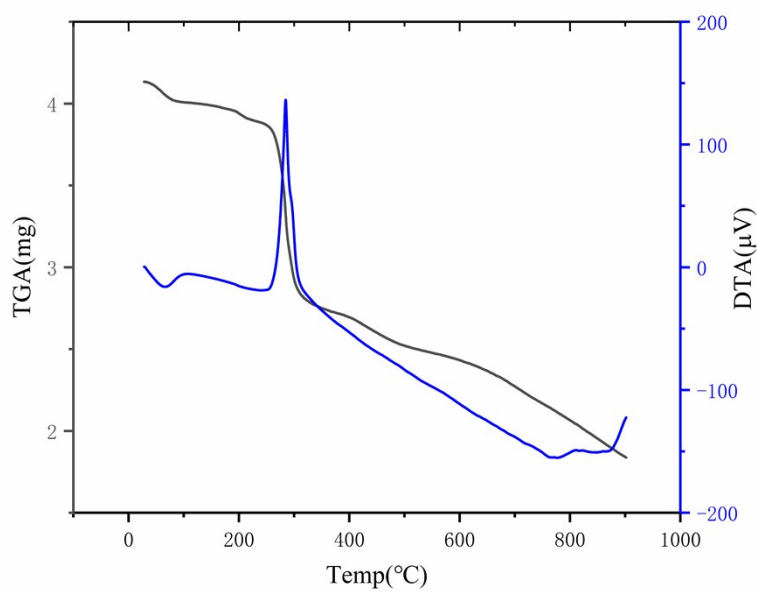

**Figure S1.** Thermogravimetric analysis of complex **1**.

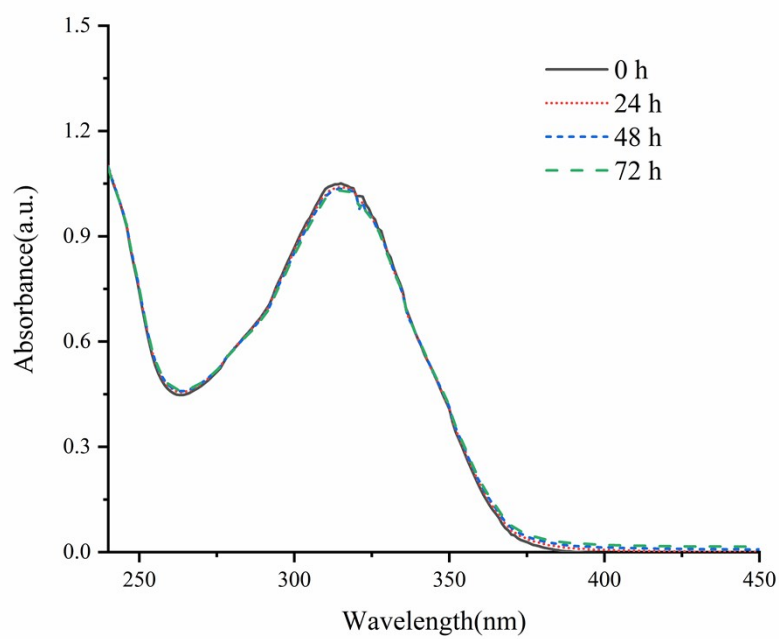

**Figure S2.** Absorption spectra of complex **1** with 10  $\mu\text{M}$  in 0.5% DMSO-Tris-HCl/NaCl buffer (25  $^{\circ}\text{C}$ ) at different time points measured by UV-Vis spectrophotometer.

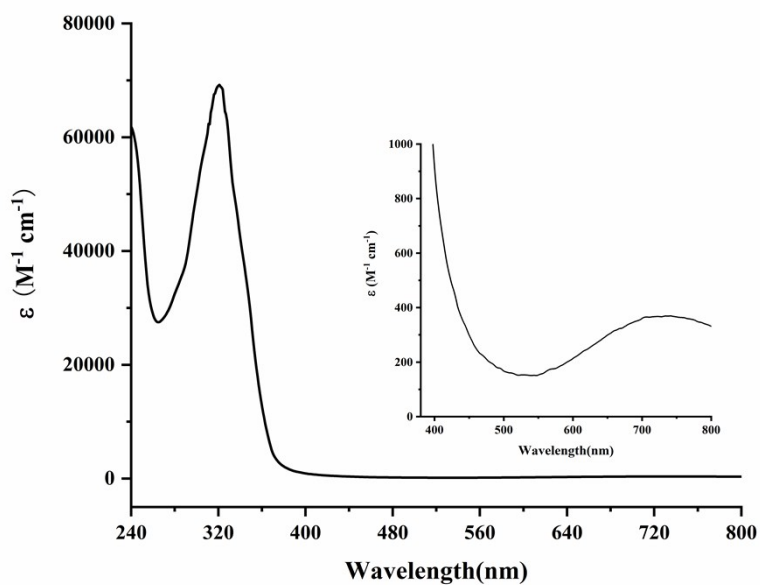

**Figure S3.** Absorption spectrum of complex **1** with 45  $\mu\text{M}$  in DMSO-Tris-HCl/NaCl buffer (25  $^{\circ}\text{C}$ ) in the UV-Vis region (240-800 nm). The inset shows the optical band in the visible region (380-800 nm) in which the d-d transition can be seen.

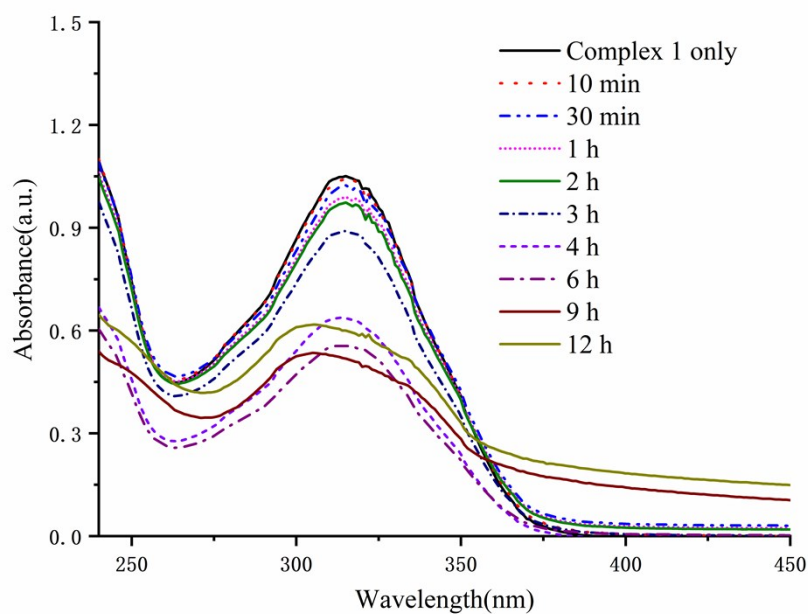

**Figure S4.** Absorption spectra of complex **1** in 0.5% DMSO-Tris-HCl/NaCl buffer containing 2mM GSH (25  $^{\circ}\text{C}$ ) at different time points.

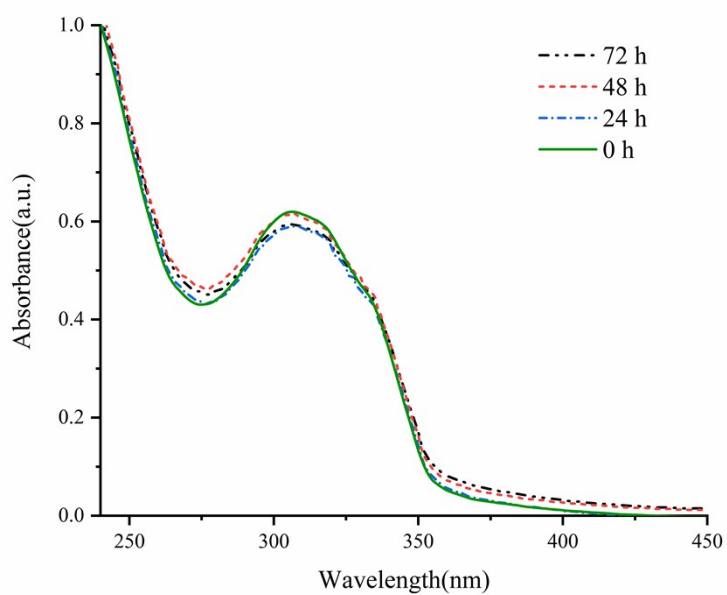

**Figure S5.** Absorption spectra of complex 1 in RPMI 1640 supplemented with 10% FBS (37 °C) at different time points.

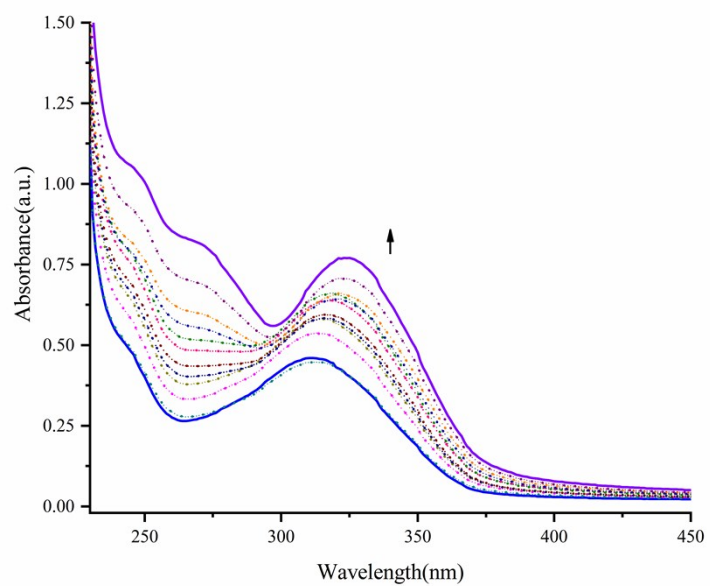

**Figure S6.** Absorption spectra of in a 5 mM Tris HCl/50 mM NaCl buffer at pH=7.2 with increasing amounts of DNA, ([CT-DNA]/[complex]: 0.25, 0.5, 1, 1.5, 2, 2.5, 3, 4, 5, 6, 7)

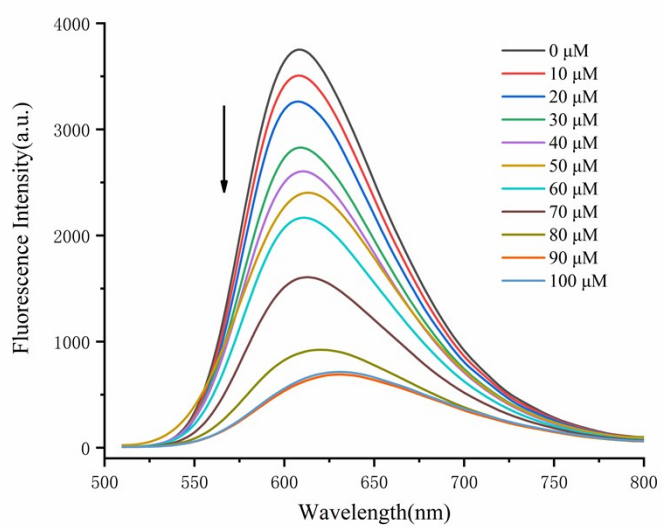

**Figure S7.** Effect of the addition of complex **1** on the emission intensity of the CT-DNA bound EB at different concentrations in a 5mM Tris-HCl/50mM NaCl buffer, pH7.2 at 37 °C.

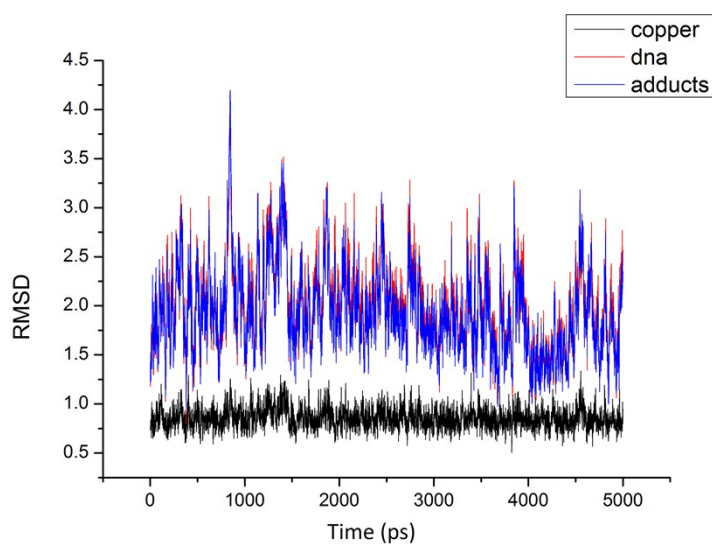

**Figure S8.** The RMSD value change using molecular dynamics simulations using AMBER11 software

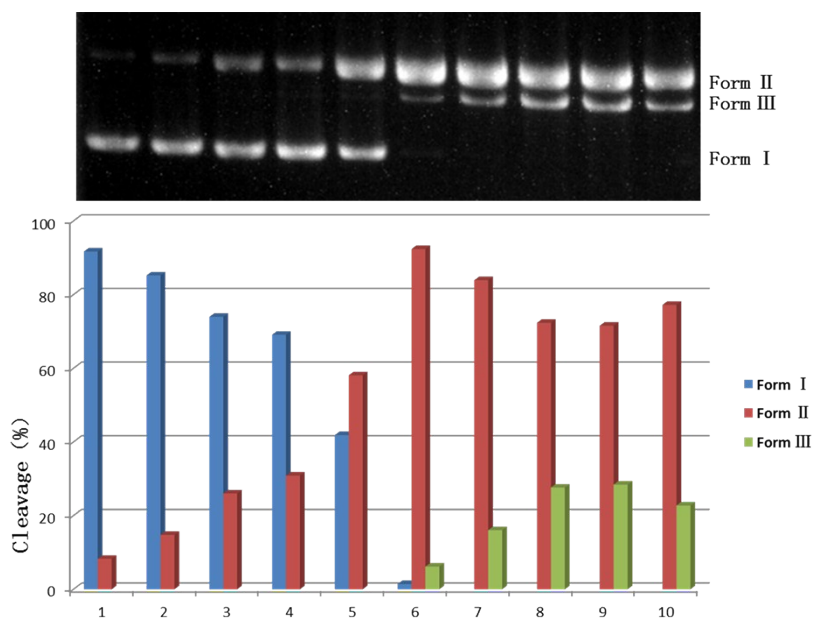

**Figure S9.** The cleavage patterns of the agarose gel electrophoresis and corresponding cleavage extent for pBR322 plasmid DNA. Lane 1, DNA ; Lane 2, DNA+ 1(50  $\mu$ M); Lane 3, DNA + Vc ; Lane 4, DNA + 1(5  $\mu$ M); Lane 5, DNA + Vc + 1(10  $\mu$ M); Lane 6, DNA + Vc + 1(15  $\mu$ M); Lane 7, DNA + Vc + 1(20  $\mu$ M), Lane 8, DNA + Vc + 1(30 $\mu$ M); Lane 9, DNA + Vc + 1(40  $\mu$ M); Lane 10, DNA + Vc + 1(50  $\mu$ M).

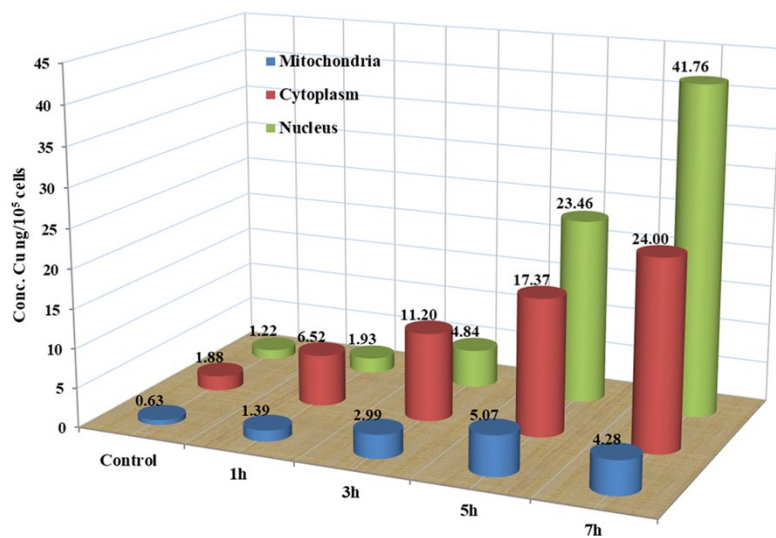

**Figure S10.** SMMC7721 cells treated by 15  $\mu$ M complex 1 at different time intervals. Copper content in 10<sup>5</sup> cells distributed in the nucleus, cytoplasm and mitochondria detected by ICP-MS.

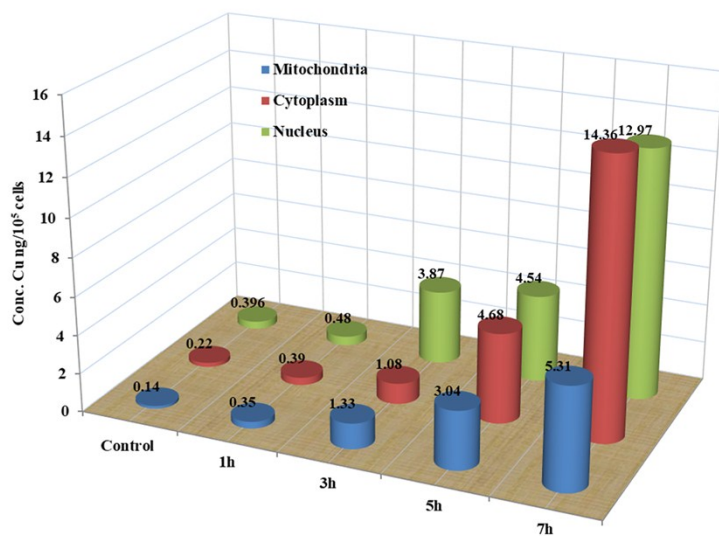

**Figure S11.** LO-2 cells treated by 15  $\mu\text{M}$  complex 1 at different time intervals. Copper content in  $10^5$  cells distributed in the nucleus, cytoplasm and mitochondria detected by ICP-MS.

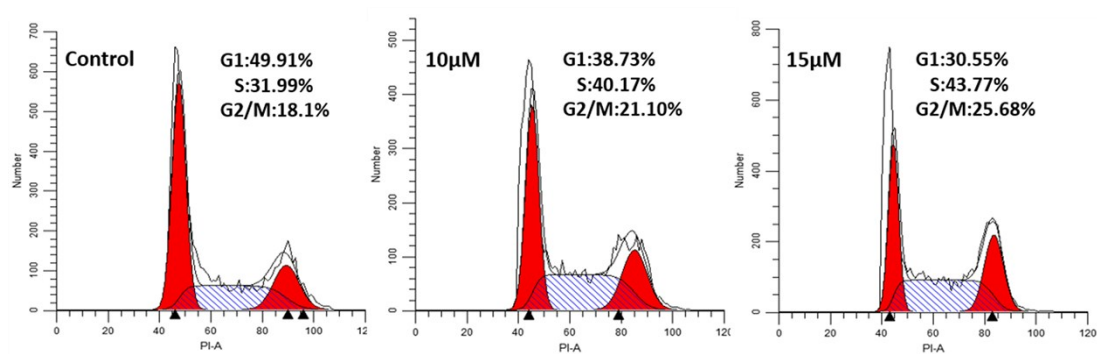

**Figure S12.** Cell cycle distribution in SMMC7721 cells after treated by different concentration of complex 1.

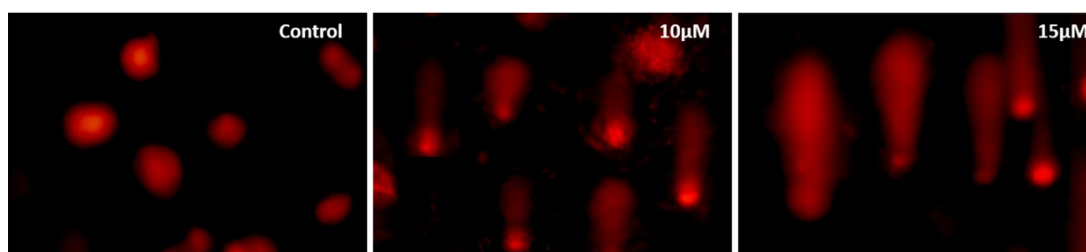

**Figure S13.** Chromosomal DNA strand breaks in SMMC7721 cells as detected by comet assay.

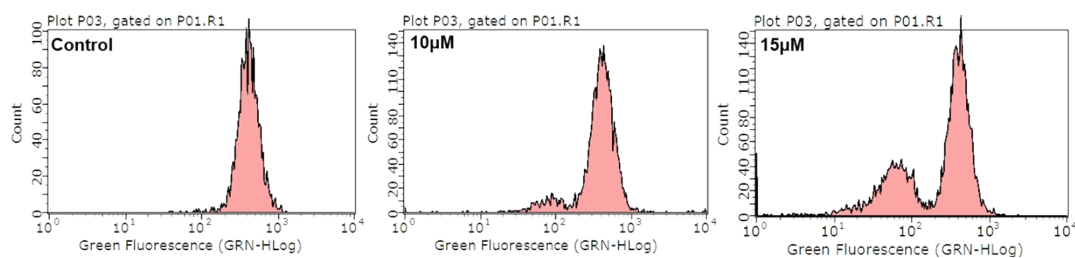

**Figure S14.** Effect of complex 1 on the  $\Delta\Psi\text{m}$  of SMMC7721 cells for 24 h

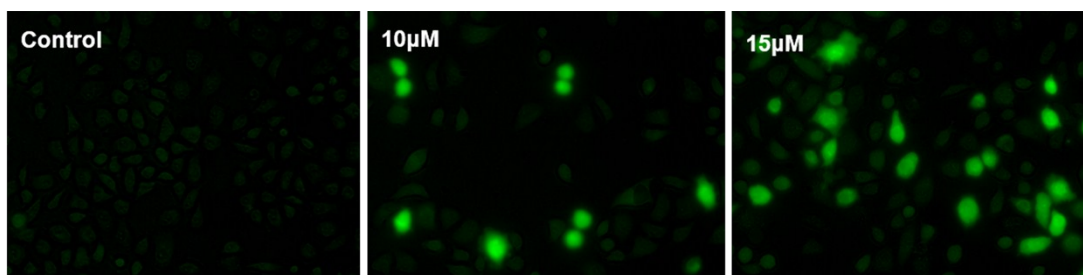

**Figure S15.** ROS generation induced by complexes with different concentrations

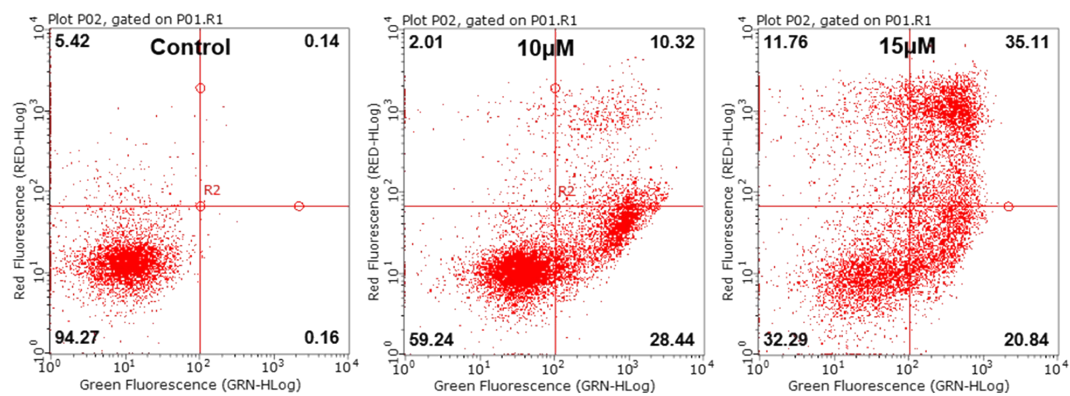

**Figure S16.** Apoptosis in SMMC7721 induced by different concentrations of complex 1



**Table S3.** Proteins showing consistently expressional changes in two group cells

| Accession      | Protein name                                                       | Gene name       | Abundance ratio | Abundance ratio |
|----------------|--------------------------------------------------------------------|-----------------|-----------------|-----------------|
|                |                                                                    |                 | (02) / (01)     | (03) / (01)     |
| O15379-2       | Isoform 2 of Histone deacetylase 3                                 | HDAC3           | 0.305           | 0.416           |
| Q01432-4       | Isoform 2 of AMP deaminase 3                                       | AMPD3           | 0.308           | 0.475           |
| Q9GZP8         | Immortalization up-regulated protein                               | IMUP            | 0.35            | 0.468           |
| Q96D05-2       | Isoform 2 of Uncharacterized protein<br>C10orf35                   | C10orf35        | 0.361           | 0.432           |
| Q9NRY2         | SOSS complex subunit C                                             | INIP            | 0.389           | 0.436           |
| Q6ZN08         | Putative zinc finger protein 66                                    | ZNF66           | 0.398           | 0.359           |
| Q9NQ50         | 39S ribosomal protein L40, mitochondrial                           | MRPL40          | 0.419           | 0.605           |
| Q9Y2D2-2       | Isoform 2 of UDP-N-acetylglucosamine<br>transporter                | SLC35A3         | 0.437           | 0.576           |
| Q9NR28         | Diablo homolog, mitochondrial                                      | DIABLO          | 0.44            | 0.609           |
| H3BN98         |                                                                    | Uncharacterized | 0.453           | 0.531           |
| P61769         | Beta-2-microglobulin                                               | B2M             | 0.46            | 0.611           |
| Q8NBM4         | Ubiquitin-associated domain-containing<br>protein 2                | UBAC2           | 0.46            | 0.76            |
| P62987         | Ubiquitin-60S ribosomal protein L40                                | UBA52           | 0.461           | 0.58            |
| P05534         |                                                                    |                 |                 |                 |
| P18077         | 60S ribosomal protein L35a                                         | RPL35A          | 0.534           | 0.598           |
| B4DL54         | Protein CHURC1-FNTB                                                | CHURC1-<br>FNTB | 0.473           | 0.561           |
| Q9UEG4         | Zinc finger protein 629                                            | ZNF629          | 0.549           | 0.605           |
| O43493         | Trans-Golgi network integral membrane<br>protein 2                 | TGOLN2          | 0.534           | 0.495           |
| O14770         | Homeobox protein Meis2                                             | MEIS2           | 0.529           | 0.468           |
| C9JEH3         | Angio-associated migratory cell protein                            | AAMP            | 0.595           | 0.55            |
| P51397         | Death-associated protein 1                                         | DAP             | 0.549           | 0.583           |
| Q8IWA5-2       | Isoform 2 of Choline transporter-like<br>protein 2                 | SLC44A2         | 0.551           | 0.566           |
| P13473-3       | Isoform LAMP-2C of Lysosome-<br>associated membrane glycoprotein 2 | LAMP2           | 0.607           | 0.615           |
| Q00535         | Cyclin-dependent-like kinase 5                                     | CDK5            | 0.61            | 0.62            |
| Q9NQX6         | Zinc finger protein 331                                            | ZNF33           | 0.691           | 0.566           |
| H7C561         | Splicing factor 1 (Fragment)                                       | SF1             | 0.617           | 0.706           |
| O75157         | TSC22 domain family protein 2                                      | TSC22D2         | 0.628           | 0.739           |
| Q5VZF2         | Muscleblind-like protein 2                                         | MBNL2           | 0.505           | 0.272           |
| Q01628         | Interferon-induced transmembrane protein                           | IFITM3          | 0.614           | 0.634           |
| A0A075B6T<br>4 | Kelch repeat and BTB domain-containing<br>protein 4                | KBTBD4          | 0.525           | 0.486           |
| Q9H0X4         | Protein FAM234A                                                    | FAM234A         | 0.683           | 0.701           |
| Q02543         | 60S ribosomal protein L18a                                         | RPL18A          | 0.718           | 0.74            |
| P31151         | Protein S100-A7                                                    | S100A7          | 0.734           | 0.636           |

|             |                                                                        |           |       |       |
|-------------|------------------------------------------------------------------------|-----------|-------|-------|
| P55061-2    | Isoform 2 of Bax inhibitor 1                                           | TMBIM6    | 0.654 | 0.683 |
| P07305      | Histone H1.0                                                           | H1F0      | 0.561 | 0.47  |
| Q13547      | Histone deacetylase 1                                                  | HDAC1     | 0.598 | 0.593 |
| Q5JTD0-2    | Isoform 2 of Tight junction-associated protein 1                       | TJAP1     | 0.723 | 0.736 |
| B7Z4C8      | 60S ribosomal protein L31                                              | RPL31     | 0.685 | 0.66  |
| P61254      | 60S ribosomal protein L26                                              | RPL26     | 0.746 | 0.767 |
| Q9NX55      | Huntingtin-interacting protein K                                       | HYPK      | 0.708 | 0.589 |
| P49591      | Serine--tRNA ligase, cytoplasmic                                       | SARS      | 0.689 | 0.666 |
| P61244      | Protein max                                                            | MAX       | 0.697 | 0.727 |
| Q7Z4H8      | KDEL motif-containing protein 2                                        | KDELC2    | 0.69  | 0.569 |
| O60337      | E3 ubiquitin-protein ligase MARCH6                                     | MARCH6    | 0.74  | 0.66  |
| P04732      | Metallothionein-1E                                                     | MT1E      | 0.721 | 0.722 |
| Q8WVV4-1    | Isoform 1 of Protein POF1B                                             | POF1B     | 0.629 | 0.63  |
| P41236      | Protein phosphatase inhibitor 2                                        | PPP1R2    | 0.751 | 0.764 |
| P09669      | Cytochrome c oxidase subunit 6C                                        | COX6C     | 0.772 | 0.731 |
| P36954      | DNA-directed RNA polymerase II subunit RPB9                            | POLR2I    | 0.626 | 0.639 |
| Q2TAL8      | Glutamine-rich protein 1                                               | QRICH1    | 0.769 | 0.737 |
| Q9Y324      | rRNA-processing protein FCF1 homolog                                   | FCF1      | 0.735 | 0.632 |
| Q8IUE6      | Histone H2A type 2-B                                                   | HIST2H2AB | 0.599 | 0.083 |
| P46776      | 60S ribosomal protein L27a                                             | RPL27A    | 0.756 | 0.785 |
| Q9UPY8      | Microtubule-associated protein RP/EB family member 3                   | MAPRE3    | 0.759 | 0.709 |
| P50238      | Cysteine-rich protein 1                                                | CRIP1     | 0.767 | 0.702 |
| P62491      | Ras-related protein Rab-11A                                            | RAB11A    | 0.669 | 0.765 |
| Q8NI22      | Multiple coagulation factor deficiency protein 2                       | MCFD2     | 0.76  | 0.516 |
| Q13131-2    | Isoform 2 of 5'-AMP-activated protein kinase catalytic subunit alpha-1 | PRKAA1    | 0.783 | 0.726 |
| A6NGJ0      | Dynein light chain Tctex-type 3                                        | DYNLT3    | 0.764 | 0.624 |
| P30530      | Tyrosine-protein kinase receptor UFO                                   | AXL       | 0.782 | 0.719 |
| P04080      | Cystatin-B                                                             | CSTB      | 0.762 | 0.685 |
| Q8N4J0      | Carnosine N-methyltransferase                                          | CARNMT1   | 0.746 | 0.753 |
| Q17RN3      | Protein FAM98C                                                         | FAM98C    | 0.669 | 0.743 |
| Q9Y5Z0      | Beta-secretase 2                                                       | BACE2     | 0.708 | 0.714 |
| Q9H467      | CUE domain-containing protein 2                                        | CUEDC2    | 0.797 | 0.606 |
| Q9H3Z4      | DnaJ homolog subfamily C member 5                                      | DNAJC5    | 0.755 | 0.752 |
| A0A0C4DG V4 | Hepatitis B virus x interacting protein                                | LAMTOR5   | 0.735 | 0.651 |
| P02462      | Collagen alpha-1(IV) chain                                             | COL4A1    | 0.69  | 0.569 |
| O15121      | Sphingolipid delta(4)-desaturase DES1                                  | DEGS1     | 0.746 | 0.728 |
| G8JLA2      | Myosin light polypeptide 6                                             | MYL6      | 0.784 | 0.627 |

|                |                                                                  |         |       |       |
|----------------|------------------------------------------------------------------|---------|-------|-------|
| P62857         | 40S ribosomal protein S28                                        | RPS28   | 2.364 | 1.863 |
| A0A0C4DFZ<br>2 | Arylsulfatase A                                                  | ARSA    | 1.678 | 1.462 |
| Q8TA94         | Zinc finger protein 563                                          | ZNF563  | 2.062 | 2.073 |
| O94864         | STAGA complex 65 subunit gamma                                   | SUPT7L  | 1.707 | 1.404 |
| Q86YZ3         | Hornerin                                                         | HRNR    | 1.843 | 1.907 |
| O00622         | Protein CYR61                                                    | CYR61   | 1.326 | 1.573 |
| A0A087WY<br>F7 | MICOS complex subunit                                            | APOOL   | 1.640 | 1.599 |
| Q8WUY8         | N-acetyltransferase 14                                           | NAT14   | 1.630 | 1.381 |
| P42684         | Abelson tyrosine-protein kinase 2                                | ABL2    | 1.726 | 1.618 |
| P61587         | Rho-related GTP-binding protein RhoE                             | RND3    | 1.759 | 4.853 |
| P02538         | Keratin, type II cytoskeletal 6A                                 | KRT6A   | 1.585 | 1.276 |
| H0Y962         | Carbonyl reductase family member 4<br>(Fragment)                 | CBR4    | 1.473 | 1.283 |
| Q9UFB7         | Zinc finger and BTB domain-containing<br>protein 47              | ZBTB47  | 1.610 | 1.657 |
| H0YL33         | Annexin (Fragment)                                               | ANXA2   | 1.862 | 1.581 |
| P08779         | Keratin, type I cytoskeletal 16                                  | KRT16   | 1.394 | 1.259 |
| Q92802-3       | Isoform 3 of NEDD4-binding protein 2-<br>like 2                  | N4BP2L2 | 1.528 | 1.581 |
| J3KP97         | Coiled-coil domain-containing protein 18<br>(Fragment)           | CCDC18  | 1.375 | 1.756 |
| P13726         | Tissue factor                                                    | F3      | 1.277 | 1.891 |
| Q14697         | Neutral alpha-glucosidase AB                                     | GANAB   | 1.606 | 3.079 |
| A0A0U1RQ<br>E4 | SH3 domain-containing protein 19                                 | SH3D19  | 1.368 | 1.319 |
| O60356-2       | Isoform 2 of Nuclear protein 1                                   | NUPR1   | 1.642 | 2.43  |
| B011T2         | Unconventional myosin-Ig                                         | MYO1G   | 1.334 | 1.715 |
| A0A087WW<br>B6 | Transgelin                                                       | TAGLN3  | 1.337 | 2.439 |
| P83110         | Serine protease HTRA3                                            | HTRA3   | 1.266 | 2.027 |
| Q9GZV5         | WW domain-containing transcription<br>regulator protein 1        | WWTR1   | 1.275 | 1.332 |
| Q06609-4       | Isoform 4 of DNA repair protein RAD51<br>homolog 1               | RAD51   | 1.376 | 1.391 |
| Q5NDL2         | EGF domain-specific O-linked N-<br>acetylglucosamine transferase | EOGT    | 1.354 | 1.563 |
| P15407         | Fos-related antigen 1                                            | FOSL1   | 1.265 | 2.034 |
| P0CG39         | POTE ankyrin domain family member J                              | POTEJ   | 1.296 | 2.238 |

**Table S4.** Top 10 enriched Gene ontology terms for cellular component, molecular function and biological

process identified using at least two techniques

| GO term ID                | GO terms                                                         | Observed gene count |
|---------------------------|------------------------------------------------------------------|---------------------|
| <b>CELLULAR COMPONENT</b> |                                                                  |                     |
| GO:0005622                | intracellular region                                             | 227                 |
| GO:0032991                | macromolecular complex                                           | 107                 |
| GO:0005634                | nucleus                                                          | 71                  |
| GO:0005886                | Plasma membrane                                                  | 37                  |
| GO:0005783                | endoplasmic reticulum                                            | 21                  |
| GO:0005856                | cytoskeleton                                                     | 19                  |
| GO:0005739                | mitochondrion                                                    | 16                  |
| GO:0005794                | Golgi apparatus                                                  | 15                  |
| GO:0005694                | chromosome                                                       | 9                   |
| GO:0042175                | Nuclear outer membrane-endoplasmic<br>reticulum membrane network | 9                   |
| <b>MOLECULAR FUNCTION</b> |                                                                  |                     |
| GO:0003824                | catalytic activity                                               | 171                 |
| GO:0005515                | protein binding                                                  | 109                 |
| GO:0003676                | nucleic acid binding                                             | 65                  |
| GO:0003735                | Structural constituent of ribosome                               | 22                  |
| GO:0004871                | Signal transducer activity                                       | 16                  |
| GO:0005200                | Structural constituent of cytoskeleton                           | 15                  |
| GO:0000166                | nucleotide binding                                               | 9                   |
| GO:0003682                | chromation binding                                               | 8                   |
| GO:0005509                | calcium binding                                                  | 6                   |
| GO:0008289                | lipid binding                                                    | 5                   |
| <b>BIOLOGICAL PROCESS</b> |                                                                  |                     |
| GO:0008152                | Metabolic process                                                | 234                 |
| GO:0071840                | Cellular component organization or<br>biogenesis                 | 83                  |
| GO:0007154                | Cell communication                                               | 75                  |
| GO:0050896                | Response to stimulus                                             | 71                  |
| GO:0050789                | Regulation of biological process                                 | 65                  |
| GO:0007040                | Biosynthesis process                                             | 67                  |
| GO:00032502               | Developmental process                                            | 49                  |
| GO:0007040                | Cell cycle                                                       | 33                  |
| GO:0030154                | Cell differentiation                                             | 19                  |
| GO:0006928                | Cellular component movement                                      | 13                  |

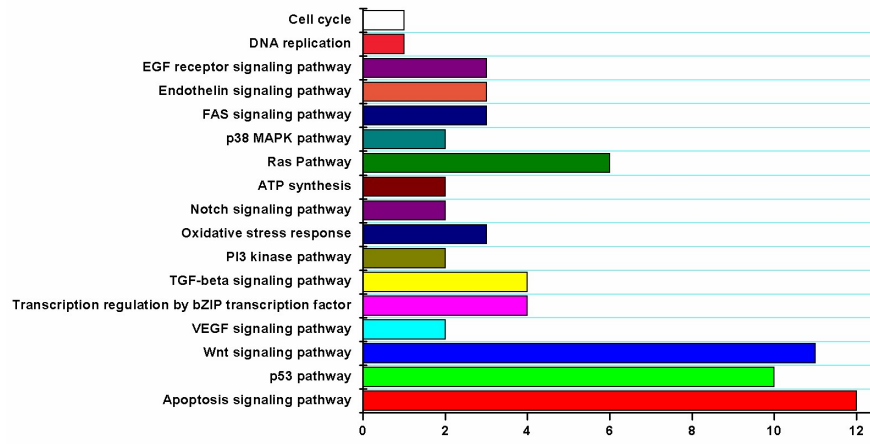

**Figure S17.** KEGG pathway analysis of identified 117 proteins involved in SMMC7721 cells treated with complex 1.
